# Supplementary material for: Molecular engineering of donor–acceptor heptazine-based porous organic polymers for selective photoreduction of CO 2 to CO under non-sacrificial conditions in water
Source: Royal Society of Chemistry journal article supplement (doi:10.1039/d4ta05379f), 2024-01-01
Supplement: d4ta05379f1.pdf [file d4ta05379f1.pdf]

## Electronic Supplementary Information

### **Molecular engineering of donor-acceptor heptazine-based porous organic polymers for selective photoreduction of CO<sub>2</sub> to CO under non-sacrificial conditions in water**

Amit Kumar<sup>a</sup>, Pravesh Kumar<sup>a</sup>, Durgesh Pandey<sup>b</sup>, Neha Saini<sup>a</sup>, Kirti Dhingra<sup>a</sup>, Dibyajyoti Ghosh<sup>b</sup>,  
and Kamalakannan Kailasam<sup>a\*</sup>

<sup>a</sup> Advanced Functional Nanomaterials, Institute of Nano Science and Technology (INST),  
Knowledge City, Sector-81, Manauli, SAS Nagar, 140306, Mohali, Punjab, India

<sup>b</sup> Department of Chemistry, Indian Institute of Technology Delhi, Hauz Khas, 110016 New Delhi,  
India

\**Email:* [kamal@inst.ac.in](mailto:kamal@inst.ac.in), [kkamal17@gmail.com](mailto:kkamal17@gmail.com)

## 1 Experimental

### 1.1. Synthesis of HEP-EDDA

The synthesis of HEP-EDDA was adapted from the reported procedure.<sup>1</sup> A flame-dried round bottom flask (RBF-1) was charged with 4,4'-(ethyne-1,2-diyl)dianiline (EDDA) (0.100 g, 0.4807 mmol) and dissolved in 1,4-dioxane (30 mL). Diisopropylamine (0.5 mL) was added and stirred for 20 min in ice-cold water. In RBF-2, 2,5,8-trichloro-*s*-heptazine (HEP) (0.088 g, 0.3205 mmol) was dissolved in 20 mL of 1,4-dioxane. Then, the solution from RBF-2 was dropwise added to the RBF-1 over a period of 20 min with constant stirring. The RBF-1 was flash-frozen at -196 °C under the N<sub>2</sub> atmosphere. Then, the system was degassed by a vacuum pump, and the solution was liquefied. After the three cycles of freeze-pump-thaw, the RBF-1 was sealed and stirred at room temperature for 1 h. Then, the reaction mixture was heated at 110 °C for 72 h to get the light yellow precipitate of HEP-EDDA. The precipitates were washed with acetone, hexane, ethyl acetate, dimethylsulfoxide (DMSO), methanol, 1,4-dioxane, and THF. For further purification the precipitates were soxhlet extracted with 1:1 mixture of THF and methanol for 24 h and then overnight kept at 120 °C in the vacuum oven.

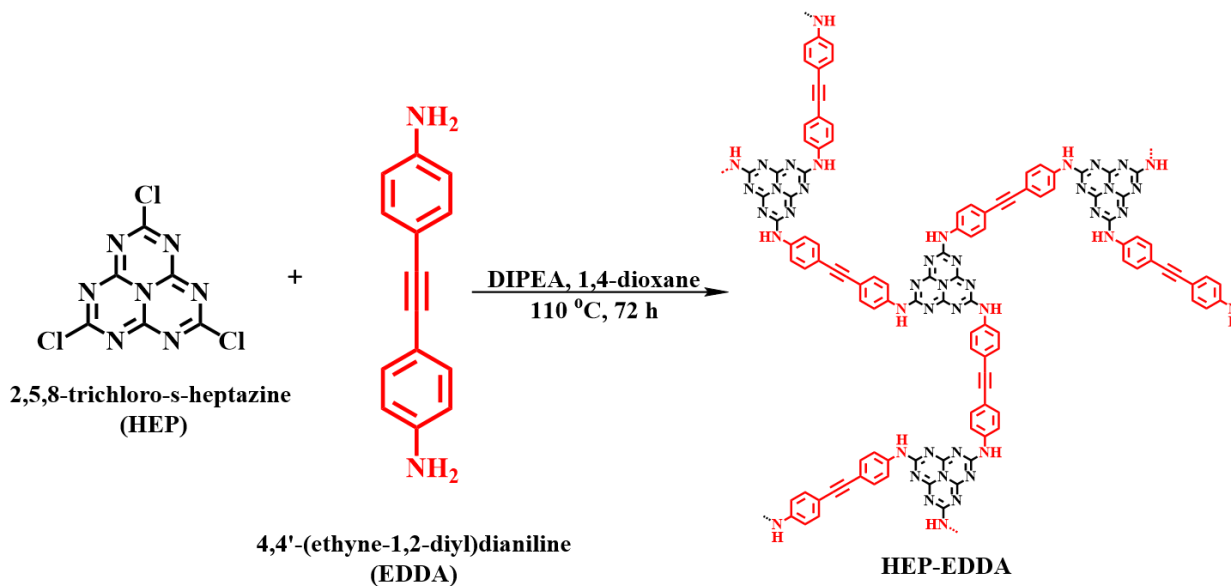

**Scheme S1:** Synthesis of HEP-EDDA.

## 1.2. Synthesis of HEP-BDDA

The synthesis of HEP-BDDA was adapted from the reported procedure.<sup>1</sup> A flame-dried round bottom flask (R1) was charged with 4,4'-(buta-1,3-diyne-1,4-diyl)dianiline (BDDA) (0.080 g, 0.3448 mmol) and dissolved in 1,4-dioxane (30 mL). Then diisopropylamine (0.5 mL) was added and stirred for 20 min in ice-cold water. In round bottom flask (R2), 2,5,8-trichloro-*s*-heptazine (HEP) (0.063 g, 0.2298 mmol) was dissolved in 20 mL of 1,4-dioxane. Then, the HEP from R2 was dropwise slowly added to the R1 with constant stirring. The R1 was flash-frozen at -196 °C under the N<sub>2</sub> atmosphere. Then, the system was degassed by a vacuum pump, and the solution was liquefied. After the three cycles of freeze-pump-thaw, the R1 was sealed and stirred at room temperature for 1 h. Then the reaction mixture was heated at 110 °C for 72 h to get the light yellow precipitate of HEP-EDDA. The precipitates were washed with acetone, hexane, ethyl acetate, dimethylsulfoxide (DMSO), methanol, 1,4-dioxane, and THF. For further purification the precipitates were soxhlet extracted with a (1:1) mixture of THF and methanol for 24 h and then dried overnight kept at 120 °C in the vacuum oven.

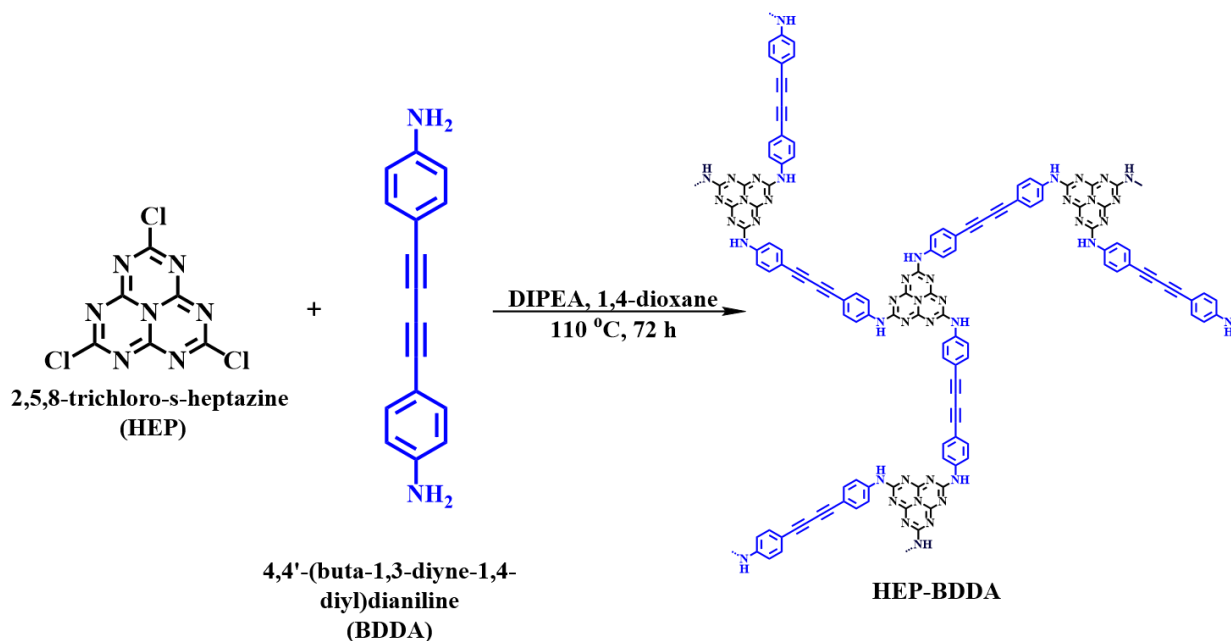

**Scheme S2:** Synthesis of HEP-BDDA.

### 1.3. Synthesis of HEP-BTET

The synthesis of HEP-BTET was adapted from the reported procedure.<sup>1</sup> A flame-dried round bottom flask (RBF-1) was charged with 4,4',4''-(benzene-1,3,5-triyltris(ethyne-2,1-diyl))trianiline (BTET) (0.080 g, 0.01814 mmol) and dissolved in 1,4-dioxane (30 mL). Then Diisopropylamine (0.5 mL) was added and stirred for 20 min in ice-cold water. In RBF-2, 2,5,8-trichloro-*s*-heptazine (HEP) (0.052 g, 0.1884 mmol) was dissolved in 20 mL of 1,4-dioxane. Then, the solution from RBF-2 was added dropwise to the RBF-1 over a period of 20 min with constant stirring. The RBF-1 was flash-frozen at -196 °C under the N<sub>2</sub> atmosphere. Then, the system was degassed by a vacuum pump, and the solution was liquefied. After the three cycles of freeze-pump-thaw, the RBF-1 was sealed and stirred at room temperature for 1 h. Then, the reaction mixture was heated at 110 °C for 72 h to obtain the light yellow precipitate of HEP-EDDA. The precipitates were washed with acetone, hexane, ethyl acetate, dimethylsulfoxide (DMSO), methanol, 1,4-dioxane, and THF. For further purification the precipitates were soxhlet extracted with (1:1) mixture of THF and methanol for 24 h and then overnight kept at 120 °C in the vacuum oven.

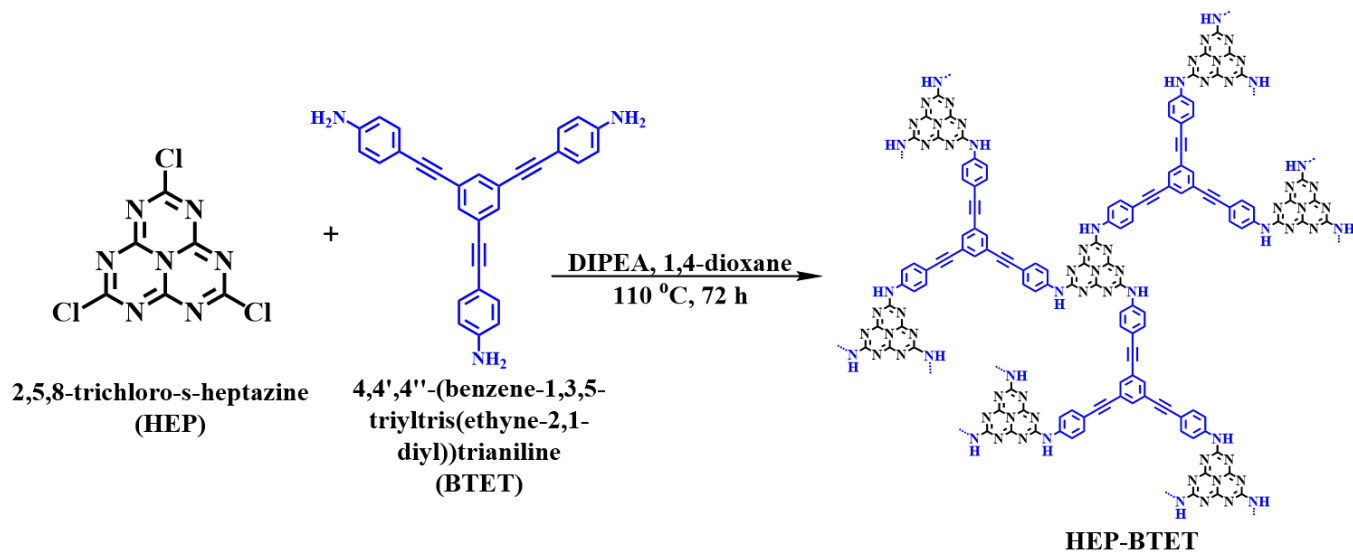

**Scheme S3:** Synthesis of HEP-BTET.

## 2. Apparent quantum yield (AQY %) calculations

It is defined as the number of electrons involved in the photocatalytic reduction to the number of incident photons.<sup>2,3</sup> The apparent quantum yield (AQY) for the photoreduction reaction was calculated with 5 mg of the catalyst under light irradiation for 3 h using an Xe lamp (400 W) with a band-pass filter of 500 nm. It is assumed that the incident photons are all absorbed by the sample. The AQY was calculated according to the below equation:

$$AQY(\%) = \frac{\text{Number of reacted electron}}{\text{Number of incident photons}} \times 100 \quad (1)$$

As, two electrons are involved in the photoreduction of CO<sub>2</sub> to CO. The above equation became:

$$AQY(\%) = \frac{2 \times N_e}{N_p} \times 100 = \frac{(2 \times M \times N_A)}{(I \times A \times t \times \lambda) / (h \times c)} \times 100 = \frac{2 \times M \times N_A \times h \times c}{I \times A \times t \times \lambda} \times 100 \quad (2)$$

M = no of CO evolved

N<sub>A</sub> = Avogadro's number

I = intensity of incident light (Wcm<sup>-2</sup>)

A = area of irradiation (cm<sup>2</sup>)

t = time of irradiation (s)

h = Planck's constant (Js)

c = the speed of light (ms<sup>-1</sup>)

λ is the wavelength of monochromatic light (m)

## 3. General procedure for quantification of H<sub>2</sub>O<sub>2</sub>

The quantification of H<sub>2</sub>O<sub>2</sub> was carried out by iodometry method based on previous literature,<sup>4,5</sup> 100 μL solution from the reaction mixture was added to the freshly prepared solution of 450 μL of 0.4 molL<sup>-1</sup> potassium iodide (KI) aqueous solution, and 450 μL of 0.1 molL<sup>-1</sup> potassium hydrogen phthalate (C<sub>8</sub>H<sub>5</sub>KO<sub>4</sub>) aqueous solution, which was kept in the dark at low temperature for 30 min. The produced H<sub>2</sub>O<sub>2</sub> molecule produces triiodide anions (I<sub>3</sub><sup>-</sup>) by the reaction of (I<sup>-</sup>) under the acidic

conditions ( $\text{H}_2\text{O}_2 + 3\text{I}^- + 2\text{H}^+ \rightarrow \text{I}_3^- + 2\text{H}_2\text{O}$ ). The quantification of the amount of ( $\text{I}_3^-$ ) formed was evaluated by UV-vis spectroscopy, ( $\text{I}_3^-$ ) having a strong absorbance at 350 nm.

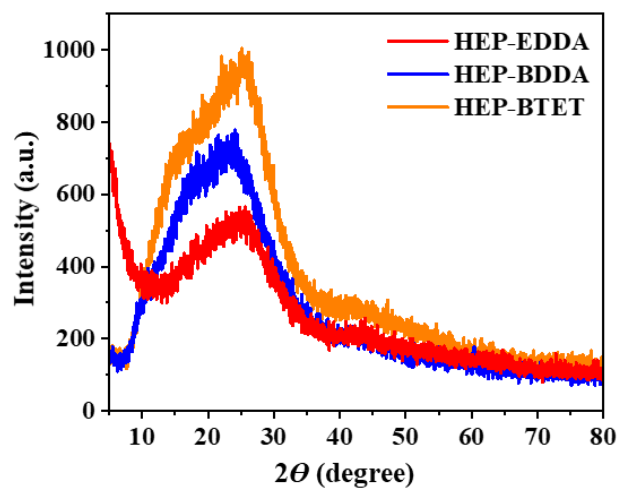

**Figure S1:** Powder X-ray diffraction of photocatalytic networks (a) HEP-EDDA, (b) HEP-BDDA, and (c) HEP-BTET.

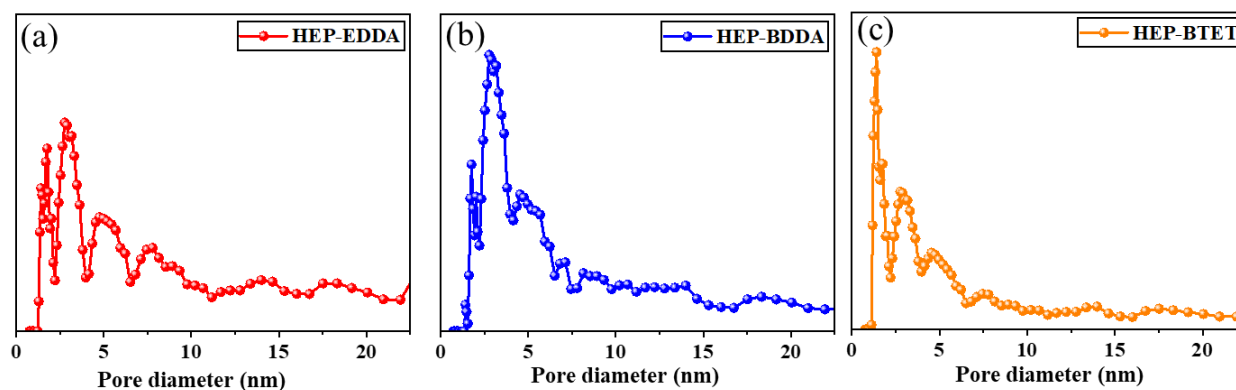

**Figure S2:** Pore size distribution curves by NLDFT method of (a) HEP-EDDA, (b) HEP-BDDA, and (c) HEP-BTET.

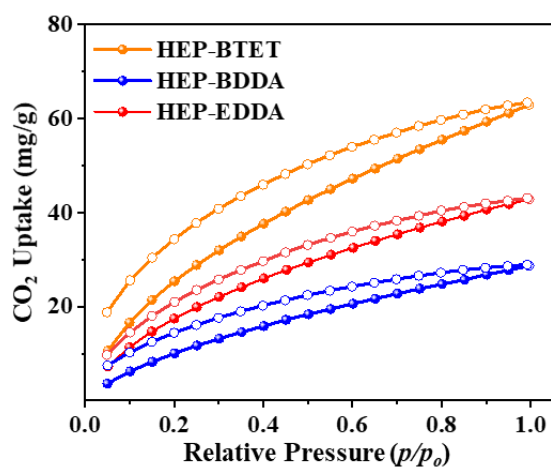

**Figure S3:** CO<sub>2</sub> uptake for HEP-BTET, HEP-BDDA, and HEP-EDDA at 273 K.

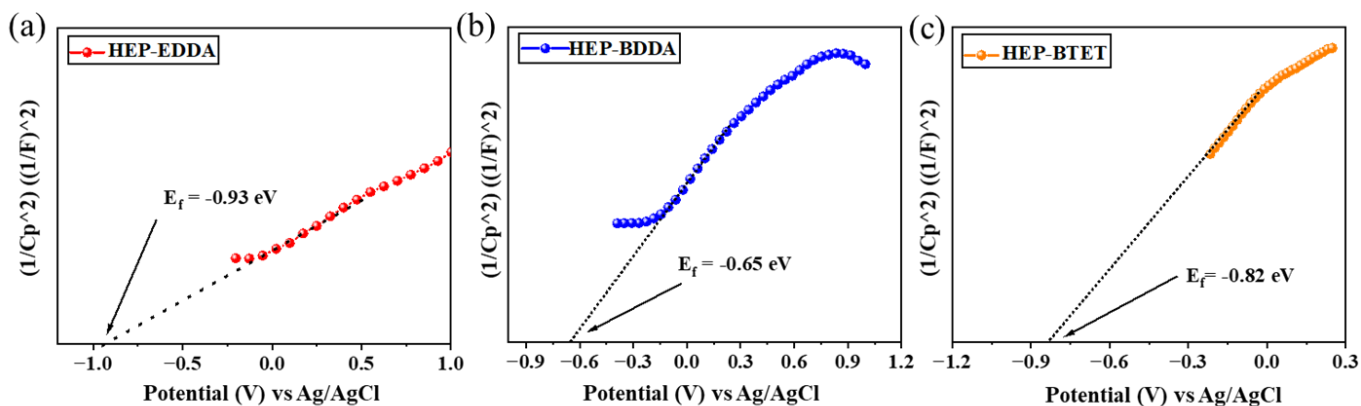

**Figure S4:** Mott-Schottky plots of photocatalysts (a) HEP-EDDA, (b) HEP-BDDA, and (c) HEP-BTET.

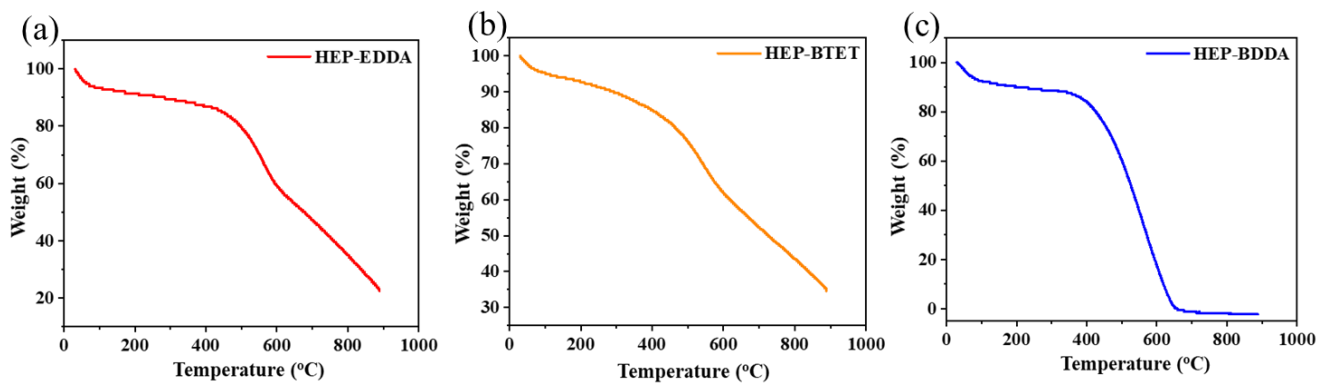

**Figure S5:** Thermogravimetric analysis of (a) HEP-EDDA, (b) HEP-BTET, and (c) HEP-BDDA in N<sub>2</sub> atmosphere.

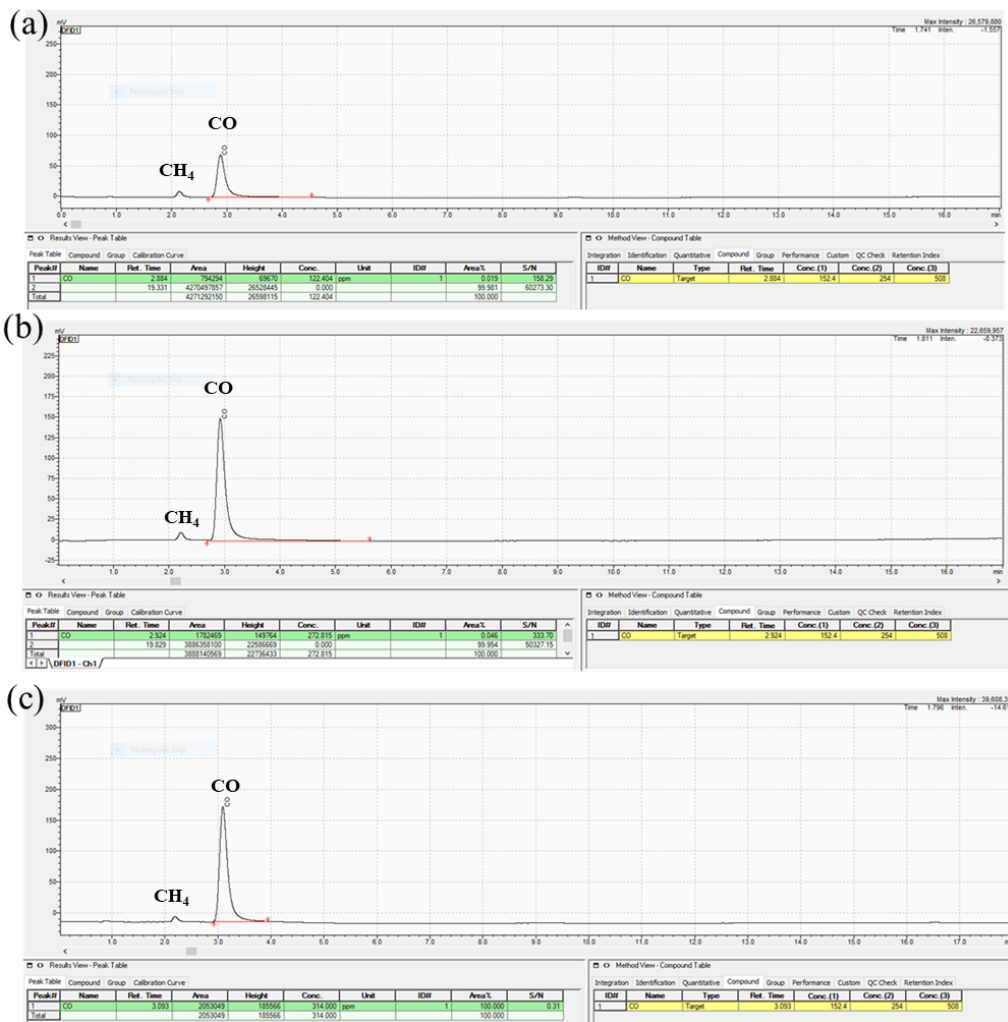

**Figure S6:** CO<sub>2</sub>-GC chromatogram of (a) HEP-EDDA, (b) HEP-BDDA, and (c) HEP-BTET for photoreduction of CO<sub>2</sub>.

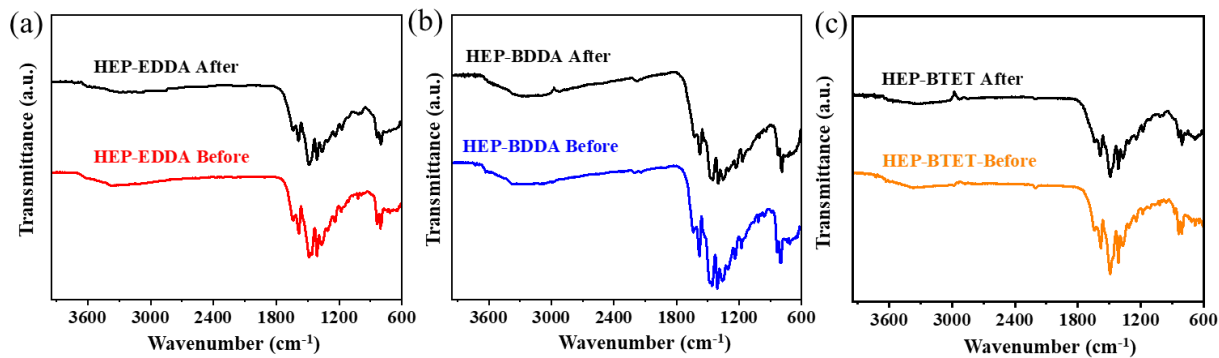

**Figure S7:** FTIR spectra before and after photocatalysis of (a) HEP-EDDA, (b) HEP-BDDA, and (c) HEP-BTET.



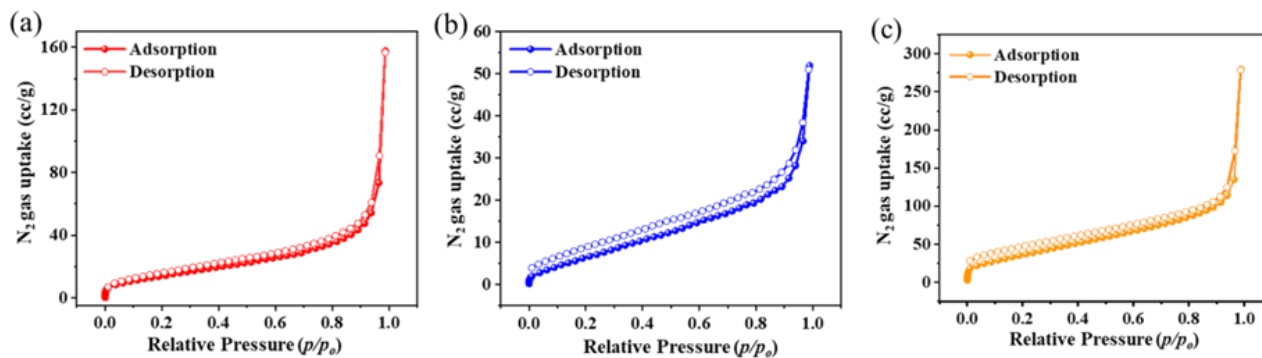

**Figure S8:**  $N_2$  adsorption-desorption isotherm after photocatalysis of (a) HEP-EDDA, (b) HEP-BDDA, and (c) HEP-BTET.

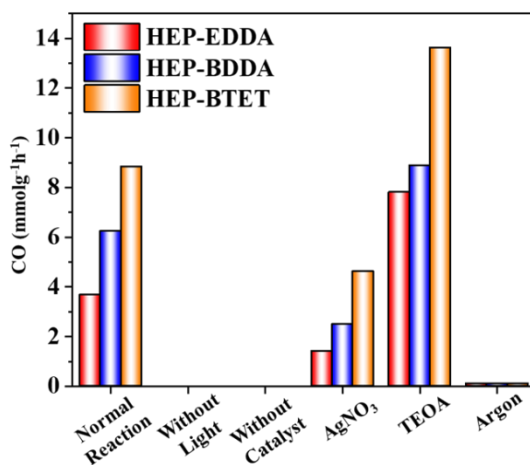

**Figure S9:** Control experiments for photoreduction of  $CO_2$ . Reaction condition: 5 mg catalyst, 3 mL  $H_2O$ ,  $CO_2$  (1 atmosphere), and solar simulated light:  $100 \text{ mW cm}^{-2}$ .

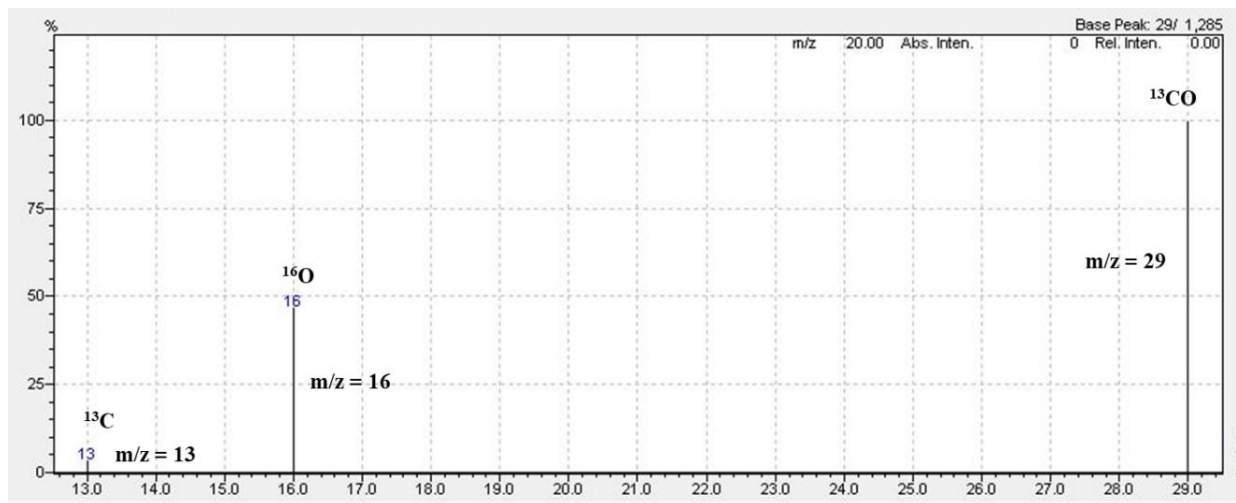

**Figure S10:** GC-MS analysis using  $^{13}\text{CO}_2$  as source of  $\text{CO}_2$  after photoreduction reaction.

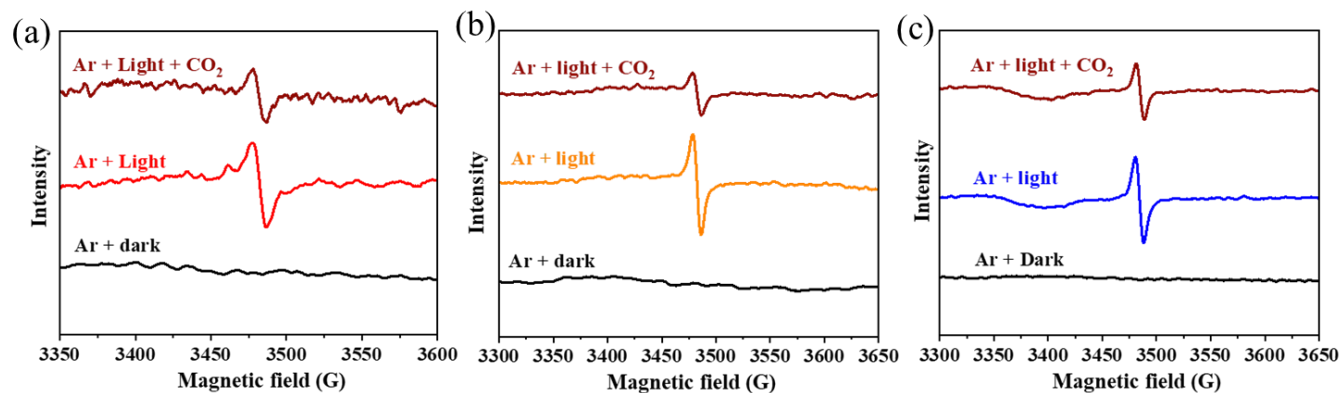

**Figure S11:** EPR spectra of (a) HEP-EDDA, (b) HEP- BTET, and (c) HEP-BDDA at different experimental conditions.

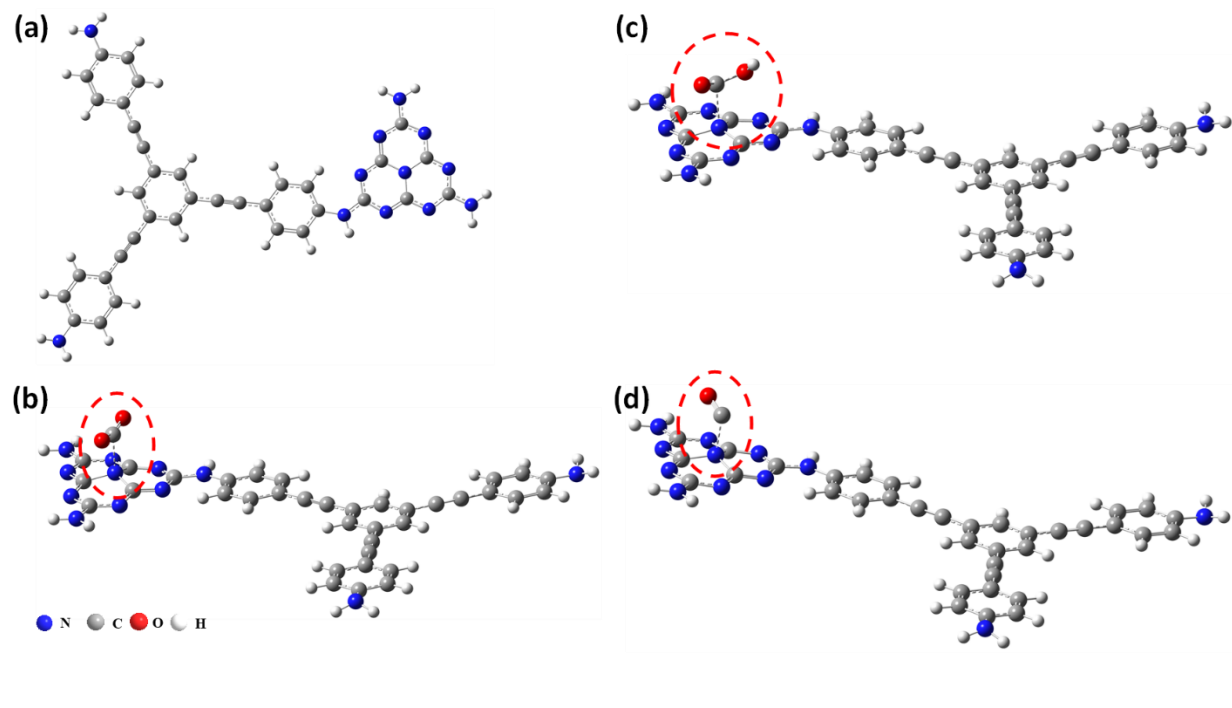

**Figure S12:** (a) Optimized structure of the surface of repeating unit of HEP-BTET, (b) Absorption and activation of the CO<sub>2</sub> molecule, (c) Formation of COOH Intermediate, and (d) Desorption of CO from the catalyst surface.

**Table S1:** Elemental Analysis of HEP-EDDA, HEP-BDDA and HEP-BTET under solvent-free conditions.

|                 | <b>C (%)</b> | <b>N (%)</b> | <b>C/N<br/>(Experimental)</b> | <b>C/N (Theoretical)</b> |
|-----------------|--------------|--------------|-------------------------------|--------------------------|
| <b>HEP-EDDA</b> | 57.50        | 23.70        | 2.42                          | 2.57                     |
| <b>HEP-BDDA</b> | 60.14        | 21.86        | 2.75                          | 2.85                     |
| <b>HEP-BTET</b> | 60.76        | 16.79        | 3.61                          | 3.42                     |

**Table S2:** Comparison with the previously reported heptazine and triazine-based photocatalyst for CO<sub>2</sub> reduction.

| Photocatalyst                                                                           | Light Source | Reaction agents* and Solvent                                                                 | CO [( $\mu\text{molg}^{-1}\text{h}^{-1}$ ) and selectivity (%)] | Ref. |
|-----------------------------------------------------------------------------------------|--------------|----------------------------------------------------------------------------------------------|-----------------------------------------------------------------|------|
| <b>Triazine based</b>                                                                   |              |                                                                                              |                                                                 |      |
| Fe SAS/Tr-COF                                                                           | Xe lamp      | TEOA and MeCN/H <sub>2</sub> O                                                               | 980.30 and 96                                                   | [6]  |
| 20%-Ni-CTAB-CTF-1                                                                       | Xe lamp      | TEOA and MeCN/H <sub>2</sub> O                                                               | 1254.15 and 99                                                  | [7]  |
| CTF-Bpy-Co[Ru(bpy) <sub>3</sub> ]Cl <sub>2</sub>                                        | Xe lamp      | [Ru(bpy) <sub>3</sub> ]Cl <sub>2</sub> .6H <sub>2</sub> O<br>TEOA and MeCN/H <sub>2</sub> O  | 1200.00 and 84                                                  | [8]  |
| Ni(OH) <sub>2</sub> -CTF-1                                                              | Xe lamp      | [Ru(bpy) <sub>3</sub> ]Cl <sub>2</sub> .6H <sub>2</sub> O<br>/TEOA and MeCN/H <sub>2</sub> O | 38.66                                                           | [9]  |
| PD@Imine-CTF                                                                            | Xe lamp      | TEOA and H <sub>2</sub> O                                                                    | 85.3 and 92 %                                                   | [10] |
| SnS <sub>2</sub> /S-CTFs                                                                | Xe lamp      | TEOA and H <sub>2</sub> O                                                                    | 123.60                                                          | [11] |
| $\alpha$ -Fe <sub>2</sub> O <sub>3</sub> @Por-CTFx/Ru(bpy) <sub>3</sub> Cl <sub>2</sub> | Xe lamp      | [Ru(bpy) <sub>3</sub> ]Cl <sub>2</sub> .6H <sub>2</sub> O<br>TEOA and DMF                    | 8.00 and 93                                                     | [12] |
| CT-COF                                                                                  | Xe lamp      | H <sub>2</sub> O                                                                             | 102.70                                                          | [13] |
| CTF-BP                                                                                  | Xe lamp      | TEOA and H <sub>2</sub> O/MeCN                                                               | 4.60                                                            | [14] |
| DA-CTF                                                                                  | Xe lamp      | TEOA and MeCN                                                                                | 4.00                                                            | [15] |
| Re-CTF-py                                                                               | Xe lamp      | TEOA and MeCN                                                                                | 353.05                                                          | [16] |
| <b>Heptazine based</b>                                                                  |              |                                                                                              |                                                                 |      |
| Porous C <sub>6</sub> N <sub>7</sub>                                                    | Xe lamp      | Water                                                                                        | 6.88                                                            | [17] |
| d5-PCN-NSs                                                                              | Xe lamp      | Co(bpy) <sub>3</sub> <sup>2+</sup> /TEOA and MeCN/H <sub>2</sub> O                           | 39.30                                                           | [18] |

|                                                         |                              |                                                  |                        |                  |
|---------------------------------------------------------|------------------------------|--------------------------------------------------|------------------------|------------------|
| TCN(NH <sub>2</sub> )                                   | Xe lamp                      | CoCl <sub>2</sub> , 2,2-bipyridine/TEOA and MeCN | 103.60                 | [19]             |
| g-C <sub>3</sub> N <sub>4</sub> with nitrogen vacancies | Xe lamp                      | CoCl <sub>2</sub> , 2,2-bipyridine/TEOA and MeCN | 56.90                  | [20]             |
| BIF-20@g-C 3N 4 nanosheet                               | Xe lamp                      | TEOA and MeCN                                    | 53.90                  | [21]             |
| <b>HEP-BTET</b>                                         | <b>solar simulated light</b> | <b>Water</b>                                     | <b>8830.00 and ~98</b> | <b>This work</b> |

\* Reaction agents: Sacrificial agents and Photosensitizers.

**Table S3:** Gibbs free energies of different species involved during the photoreduction of CO<sub>2</sub>.

| Species                       | $\Delta G$ (Hartrees) |
|-------------------------------|-----------------------|
| Catalyst                      | -2043.327383          |
| CO <sub>2</sub>               | -188.65592            |
| CO <sub>2</sub> *             | -2231.892561          |
| COOH*                         | -2232.426219          |
| CO*                           | -2156.596111          |
| CO                            | -113.363129           |
| CHO*                          | -2157.166317          |
| OH*                           | -2119.071429          |
| H <sub>2</sub> O <sub>2</sub> | -151.596618           |

## References:

- 1 N. Sharma, B. Ugale, S. Kumar and K. Kailasam, *Front. Chem.*, 2021, **9**, 1–11.
- 2 M. Lu, M. Zhang, J. Liu, T. Y. Yu, J. N. Chang, L. J. Shang, S. L. Li and Y. Q. Lan, *J.*

- Am. Chem. Soc.*, 2022, **144**, 1861–1871.
- 3 N. Saini, N. Sharma, D. K. Chauhan, R. Khurana, M. E. Ali and K. Kailasam, *J. Mater. Chem. A*, 2023, **11**, 25743–25755.
  - 4 V. R. Battula, B. Rawat and K. Kailasam, *ACS Appl. Polym. Mater.*, 2023, **5**, 1989–1997.
  - 5 Z. Wei, M. Liu, Z. Zhang, W. Yao, H. Tan and Y. Zhu, *Energy Environ. Sci.*, 2018, **11**, 2581–2589.
  - 6 L. Ran, Z. Li, B. Ran, J. Cao, Y. Zhao, T. Shao, Y. Song, M. K. H. Leung, L. Sun and J. Hou, *J. Am. Chem. Soc.*, 2022, **144**, 17097–17109.
  - 7 J. Tian, J. Zhang, B. Xu, Q. Chen, G. Huang and J. Bi, *ChemSusChem*, 2022, **15**, e202201107.
  - 8 X. Hu, L. Zheng, S. Wang, X. Wang and B. Tan, *Chem. Commun.*, 2022, **58**, 8121–8124.
  - 9 T. Zhao, Q. Niu, G. Huang, Q. Chen, Y. Gao, J. Bi and L. Wu, *J. Colloid Interface Sci.*, 2021, **602**, 23–31.
  - 10 S. Guo, Y. Xiao and B. Jiang, *ACS Sustain. Chem. Eng.*, 2021, **9**, 12646–12654.
  - 11 S. Guo, P. Yang, Y. Zhao, X. Yu, Y. Wu, H. Zhang, B. Yu, B. Han, M. W. George and Z. Liu, *ChemSusChem*, 2020, **13**, 6278–6283.
  - 12 S. Zhang, S. Wang, L. Guo, H. Chen, B. Tan and S. Jin, *J. Mater. Chem. C*, 2020, **8**, 192–200.
  - 13 K. Lei, D. Wang, L. Ye, M. Kou, Y. Deng, Z. Ma, L. Wang and Y. Kong, *ChemSusChem*, 2020, **13**, 1725–1729.
  - 14 J. Li, P. Liu, H. Huang, Y. Li, Y. Tang, D. Mei and C. Zhong, *ACS Sustain. Chem. Eng.*, 2020, **8**, 5175–5183.
  - 15 H. Zhong, Z. Hong, C. Yang, L. Li, Y. Xu, X. Wang and R. Wang, *ChemSusChem*, 2019, **12**, 4493–4499.

- 16 R. Xu, X.-S. Wang, H. Zhao, H. Lin, Y.-B. Huang and R. Cao, *Catal. Sci. Technol.*, 2018, **8**, 2224–2230.
- 17 Gao Z, Jiang Z, Liu M, Yang Y, Ali S, Xie Q, Li Y, Gu S, Liu Y, Tang J, Pan C, Yuan J, Yu G. *Sci. China Chem.*, 2024, **67**.
- 18 R. Wang, P. Yang, S. Wang and X. Wang, *J. Catal.*, 2021, **402**, 166–176.
- 19 Z. Mo, X. Zhu, Z. Jiang, Y. Song, D. Liu, H. Li, X. Yang, Y. She, Y. Lei, S. Yuan, H. Li, L. Song, Q. Yan and H. Xu, *Appl. Catal. B Environ.*, 2019, **256**, 117854.
- 20 H. Shi, S. Long, J. Hou, L. Ye, Y. Sun, W. Ni, C. Song, K. Li, G. G. Gurzadyan and X. Guo, *Chem. - A Eur. J.*, 2019, **25**, 5028–5035.
- 21 G. Xu, H. Zhang, J. Wei, H. X. Zhang, X. Wu, Y. Li, C. Li, J. Zhang and J. Ye, *ACS Nano*, 2018, **12**, 5333–5340.
